# Supplementary material for: Armillaria luteo-virens Sacc Ameliorates Dextran Sulfate Sodium Induced Colitis through Modulation of Gut Microbiota and Microbiota-Related Bile Acids
Source: MDPI journal article supplement (doi:10.3390/nu13113926), 2021-11-03
Supplement: s1 [file s1]

**Supplementary Materials:** The following are available online at

<https://www.mdpi.com/article/10.3390/nu13113926/s1>, Table S1: The macronutrient composition of the ALS powder in the study, Table S2: The formula of Chow and ALS diet in the study Table S3: List of primers used in this study.

**Table S1.** The macronutrient composition of the ALS powder in the study.

| Macronutrient           | Unit (g/100g) |
|-------------------------|---------------|
| Protein                 | 39.2          |
| Fat                     | 8.6           |
| Carbohydrate            | 41.15         |
| Soluble dietary fiber   | 26.63         |
| Insoluble dietary fiber | 12.65         |
| Moisture                | 3.85          |
| Ash                     | 7.2           |

**Table S2.** The formula of Chow and ALS diet in the study.

| Ingredient          | Chow diet | ALS diet |
|---------------------|-----------|----------|
| Casein              | 189.58    | 156.3    |
| L-cystine           | 2.84      | 2.84     |
| Corn Starch         | 298.59    | 297      |
| Maltodextrin 10     | 33.18     | 33.18    |
| Sucrose             | 331.77    | 331.77   |
| ALS                 | 0         | 81       |
| Cellulose           | 47.4      | 15       |
| Soybean Oil         | 23.7      | 23.7     |
| Lard                | 18.96     | 12       |
| Mineral Mix S10026  | 9.48      | 9.48     |
| Dicalcium Phosphate | 12.32     | 12.32    |
| Calcium Carbonate   | 5.21      | 5.21     |
| Potassium Citrate   | 15.64     | 15.64    |
| Vitamin Mix V10001  | 9.48      | 9.48     |
| Choline Bitartrate  | 1.9       | 1.9      |
| Total               | 1000      | 1008.57  |

<sup>1</sup> Chow and ALS diets are isocaloric and comprised of 20% protein, 10% fat and 70% carbohydrate.

**Table S3.** List of primers used in this study.

| Genes             | Gene bank accession | Primers            | Primers sequence                                              | Annealing temperatures(°C) | Amplicon Size (bp) |
|-------------------|---------------------|--------------------|---------------------------------------------------------------|----------------------------|--------------------|
| <i>Spdef</i>      | NM_001357728.1      | Forward<br>Reverse | 5'-CTCGCTAGAGCAGGTGCAAT-3'<br>5'-AGCCACTTCTGCACGTTACC-3'      | 54<br>54                   | 126                |
| <i>FXR</i>        | NM_001163504.1      | Forward<br>Reverse | 5'-TCCTTGTCTCCTCGGAACA-3'<br>5'-TGGGGTTTCCTGAAGCCTTG-3'       | 60<br>60                   | 166                |
| <i>Cyp7a1</i>     | NM_029865.2         | Forward<br>Reverse | 5'-CTGCACCCTGAGAAGCATCC-3'<br>5'-CGAGAACTCGCCATACTGGT-3'      | 60<br>59                   | 144                |
| <i>ZO-1</i>       | XM_021187463.2      | Forward<br>Reverse | 5'-AGTTCTGCCCTCAGCTACCA-3'<br>5'-GCTTAAAGCTGGCAGTGTC-3'       | 54<br>51                   | 173                |
| <i>Claudin1</i>   | NM_016674.4         | Forward<br>Reverse | 5'-CACTTCCAGACTCCACCACC-3'<br>5'-CGATCCATCCCAGAGAAGCC-3'      | 56<br>56                   | 249                |
| <i>Claudin2</i>   | XM_006528490.4      | Forward<br>Reverse | 5'-CTTCGGGACTTCTACTCGCC-3'<br>5'-AGTTGGTACGATTGCCCTGG-3'      | 56<br>54                   | 151                |
| <i>Claudin4</i>   | NM_009903.2         | Forward<br>Reverse | 5'-CGTCATCCGCGACTTCTACA-3'<br>5'-GAGTAGGGCTTGTCGTTGCT-3'      | 59<br>60                   | 159                |
| <i>Occludin</i>   | XM_032898729.1      | Forward<br>Reverse | 5'-ACAAAGAGCTCTCTCGTCTCG-3'<br>5'-CATAGTCTCCCACCATCCTC-3'     | 54<br>54                   | 192                |
| <i>Klf4</i>       | MT592851.1          | Forward<br>Reverse | 5'-AGAACAGCCACCCACACTTG-3'<br>5'-CCCTGTGTGTTTGCGGTAGT-3'      | 54<br>54                   | 183                |
| <i>Reg3g</i>      | NM_011260.2         | Forward<br>Reverse | 5'-CGTGCCTATGGCTCCTATTGCT--3'<br>5'-TTCAGCGCCACTGAGCACAGAC-3' | 57<br>59                   | 121                |
| <i>Fut2</i>       | NM_001271993.1      | Forward<br>Reverse | 5'-AGTTTCCTTGGTCCTGAACGA-3'<br>5'-CTACAGCAATCCTCTTCTGGC-3'    | 52<br>54                   | 131                |
| <i>Reg3b</i>      | XM_029478855.1      | Forward<br>Reverse | 5'-CCCAGGCTTATGGCTCCTAC-3'<br>5'-ATGGAGCCCAATCCAAGTGT-3'      | 54<br>53                   | 191                |
| <i>Shp</i>        | NM_011850.3         | Forward<br>Reverse | 5'-GCACGATCCTCTTCAACCCA-3'<br>5'-CAGAAGGGTGCCTGGAATGT-3'      | 60<br>60                   | 185                |
| <i>Defensin 4</i> | NM_010039.2         | Forward<br>Reverse | 5'-AGGCTGATCCTATCCAAAACACA-3'<br>5'-TGGCCTCCAAAGGAGATAGACA-3' | 55<br>53                   | 92                 |
